# Supplementary material
Source: PubMed Central journal article supplement (PMC3980411)
Supplement: mmc1.pdf [file mmc1.pdf]

The American Journal of Human Genetics, Volume 94

Supplemental Data

## **Two Functional Lupus-Associated *BLK* Promoter Variants Control Cell-Type- and Developmental-Stage-Specific Transcription**

Joel M. Guthridge, Rufei Lu, Harry Sun, Celi Sun, Graham B. Wiley, Nicolas Dominguez, Susan R. Macwana, Christopher J. Lessard, Xana Kim-Howard, Beth L. Cobb, Kenneth M. Kaufman, Jennifer A. Kelly, Carl D. Langefeld, Adam J. Adler, Isaac T.W. Harley, Joan T. Merrill, Gary S. Gilkeson, Diane L. Kamen, Timothy B. Niewold, Elizabeth E. Brown, Jeffery C. Edberg, Michelle A. Petri, Rosalind Ramsey-Goldman, John D. Reveille, Luis M. Vilá, Robert P. Kimberly, Barry I. Freedman, Anne M. Stevens, Susan A. Boackle, Lindsey A. Criswell, Tim J. Vyse, Timothy W. Behrens, Chaim O. Jacob, Marta E. Alarcón-Riquelme on behalf of the BIOLUPUS Network, Kathy L. Sivils, Jiyoun Choi, Young Bin Joo, So-Young Bang, Hye-Soon Lee, Sang-Cheol Bae, Nan Shen, Xiaoxia Qian, Betty P. Tsao, R. Hal Scofield, John B. Harley, Carol F. Webb, Edward K. Wakeland, Judith A. James, Swapan K. Nath, Robert R. Graham, and Patrick M. Gaffney

**Figure S1.**

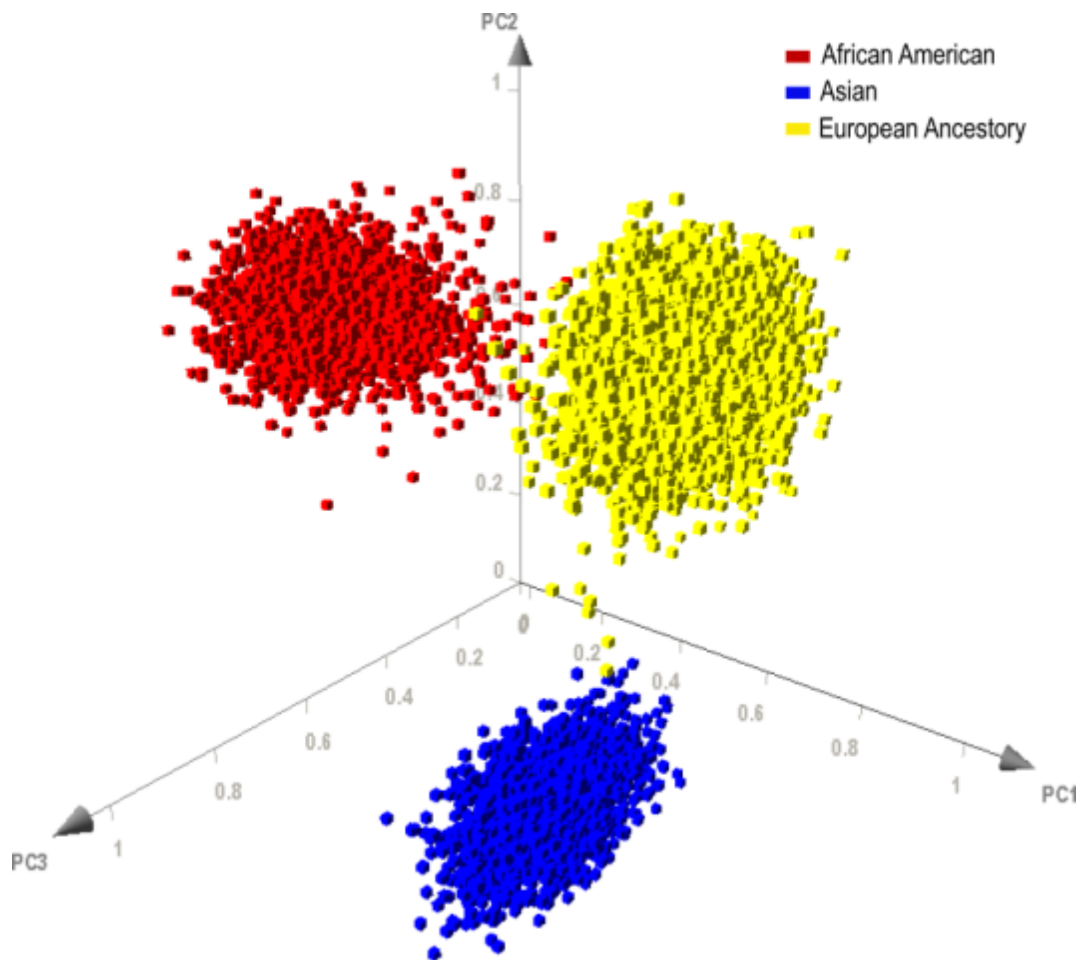

**Figure S1.** Population substructure of study participants used in genetic association analysis.

The population segregation based on the first three principle components calculated for this dataset are shown. Red = African-American; Blue = Asian; Yellow = European-American

**Figure S2.**

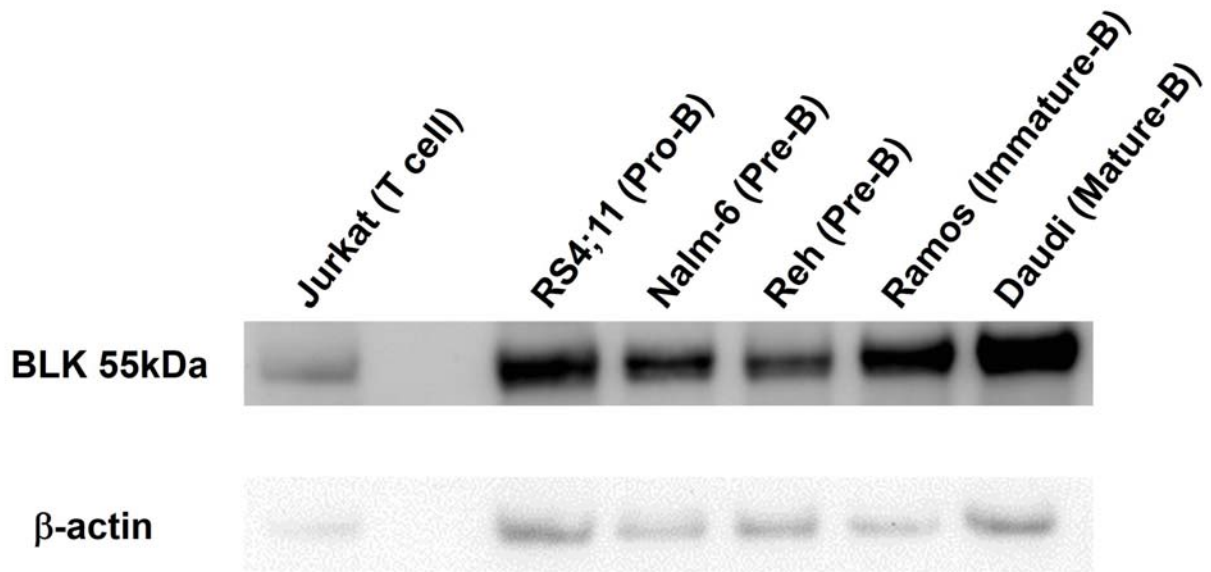

**Figure S2:** BLK protein expression in the cell lines used in reporter assays. The 55 kDa BLK band was detected in all cell lines used in the study using the anti-human BLK antibody (clone 7A12, Novus Biologicals). The antibody has been shown to specifically bind to BLK native and recombinant proteins.

**Figure S3.**

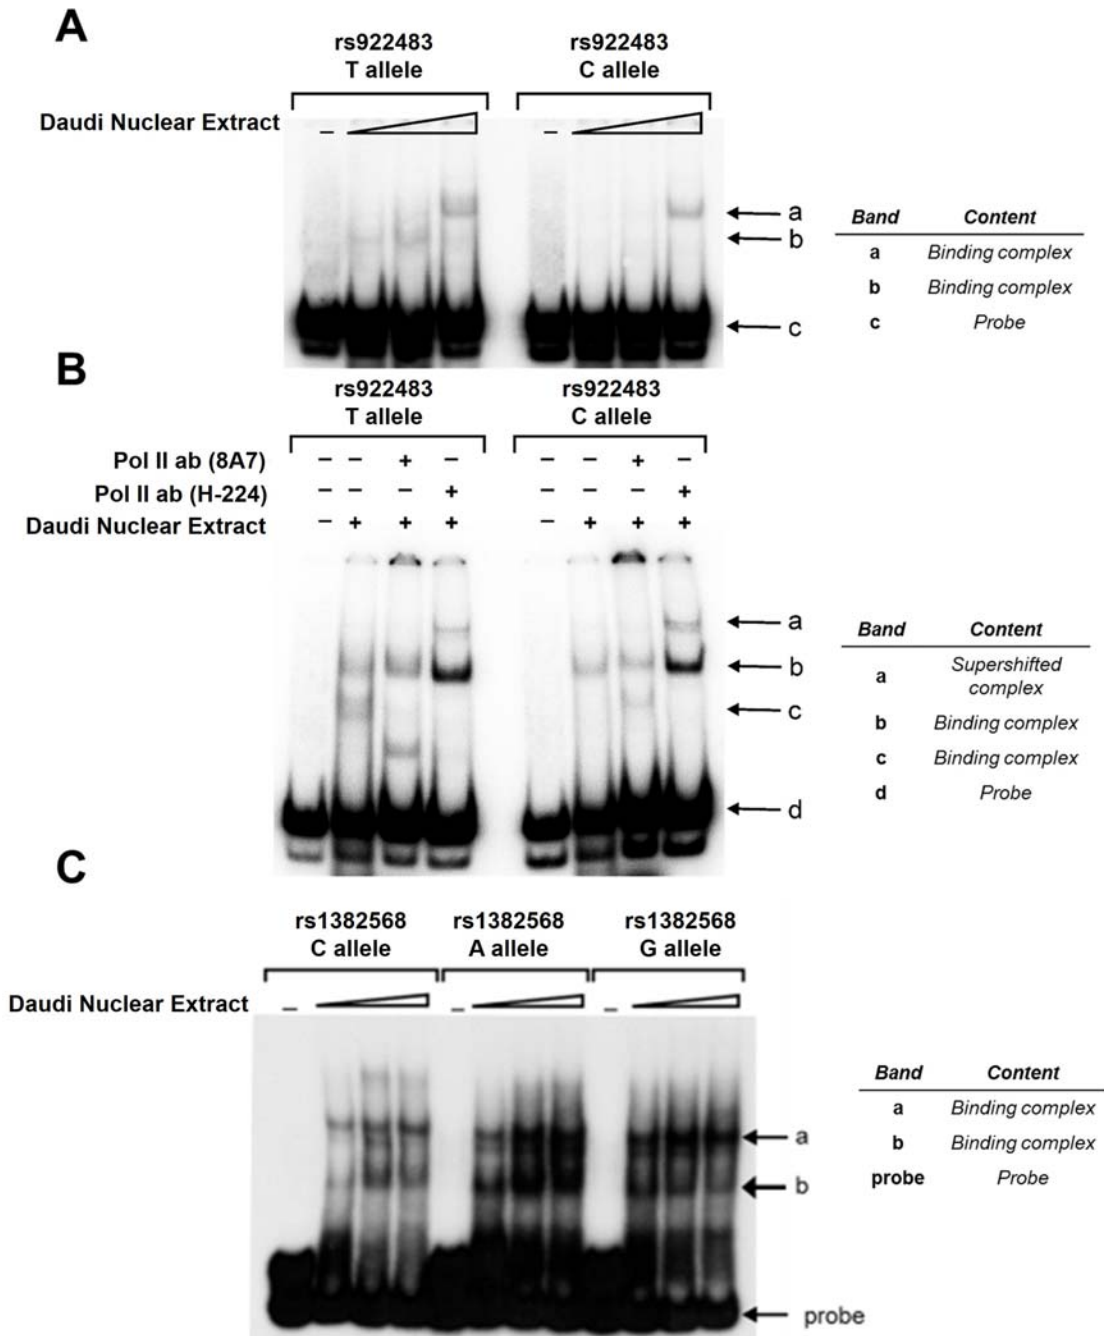

**Figure S3:** Risk alleles at rs922483 and rs1382568 influence binding of specific transcriptional factors (TFs) complexes. Electrophoretic mobility shift assay confirming differences in nuclear

factor binding of Probe P1 (100 bp) flanking the P1 SNP variant (rs922483) is shown in panel (A). “-” represents labeled DNA probe only control. Subsequent lanes represent the binding of increasing amounts of nuclear factors extracted from Daudi nuclei. Supershift assay of P1 probe is shown in panel (B). Two ug of anti-RNAPII antibodies were co-incubated with nuclear factor prior to the addition of labeled probes. The electrophoretic mobility shift of probe P2 flanking P2 SNP (rs1382568) is shown in panel (C). Increasing amount of nuclear factors extracted from Daudi nuclei were used to titrate the binding affinity. All results shown are of a representative experiment.

Figure S4.

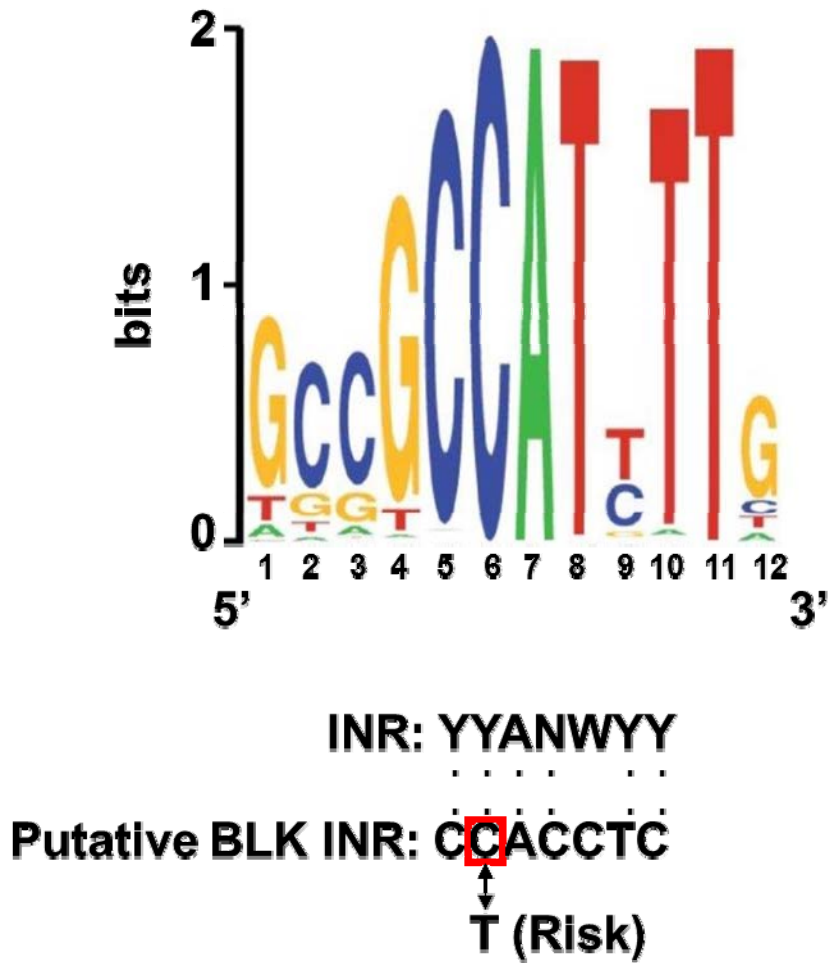

**Figure S4.** The variant rs922483 resides within a human Initiation (INR) motif. A weblogo diagram (<http://weblogo.berkeley.edu/logo.cgi>) based on alignments of INR motifs done by Yarden et.al.<sup>1</sup> and the corresponding *BLK* putative INR sequence with the location of variant rs922483 is shown (red box). *BLK* sequence location is shown in **Figure 1D**.

**Table S1:** Source and demographics of samples used in the SNP genotyping association analyses presented.

| Contributor/Group                                                 | <i>European-Ancestry</i> |             | <i>Asian</i> |             | <i>African-American</i> |             | <i>Total</i> |         |
|-------------------------------------------------------------------|--------------------------|-------------|--------------|-------------|-------------------------|-------------|--------------|---------|
|                                                                   | Case                     | Control     | Case         | Control     | Case                    | Control     | Case         | Control |
| Stevens: United States (Washington)                               | 19                       | 0           | 10           | 0           | 2                       | 0           | 31           | 0       |
| Tsao: United States (California), China                           | 30                       | 0           | 534          | 483         | 70                      | 6           | 634          | 489     |
| Jacob: United States (California)                                 | 108                      | 0           | 82           | 0           | 0                       | 0           | 190          | 0       |
| <sup>a</sup> PROFILE: Brown: United States (Alabama)              | 731                      | 1083        | 0            | 0           | 575                     | 637         | 1306         | 1720    |
| CLU & SLEIGH: Gilkeson, Kamen: United States (South Carolina)     | 73                       | 175         | 0            | 0           | 112                     | 65          | 185          | 240     |
| <sup>b</sup> LFRR/ORDRCC: Harley, James: United States (Oklahoma) | 667                      | 553         | 0            | 0           | 428                     | 209         | 1095         | 762     |
| <sup>c</sup> LuMNS: Gaffney, Sivils : United States (Minnesota)   | 445                      | 0           | 0            | 0           | 0                       | 0           | 445          | 0       |
| ORDRCC: James: United States (Oklahoma)                           | 122                      | 137         | 2            | 46          | 52                      | 55          | 176          | 238     |
| Merrill: United States (Oklahoma)                                 | 78                       | 2           | 0            | 0           | 28                      | 5           | 106          | 7       |
| Vyse: England                                                     | 248                      | 528         | 0            | 0           | 0                       | 0           | 248          | 528     |
| Scofield: United States (Oklahoma)                                | 30                       | 66          | 0            | 0           | 0                       | 0           | 30           | 66      |
| <sup>d</sup> TRIDOM: Niewold: United States (Illinois, Minnesota) | 79                       | 0           | 0            | 0           | 139                     | 0           | 218          | 0       |
| Criswell: United States (California)                              | 79                       | 0           | 0            | 0           | 0                       | 0           | 79           | 0       |
| Boackle: United States (Colorado)                                 | 14                       | 0           | 2            | 0           | 0                       | 0           | 16           | 0       |
| <sup>e</sup> Gregersen: United States (New York)                  | 0                        | 0           | 0            | 0           | 0                       | 299         | 0            | 299     |
| Freedman: United States (North Carolina)                          | 0                        | 0           | 0            | 0           | 0                       | 458         | 0            | 458     |
| Bae: South Korea                                                  | 0                        | 0           | 642          | 741         | 0                       | 0           | 642          | 741     |
| BIOLUPUS: Sweden                                                  | 78                       | 0           | 0            | 0           | 0                       | 0           | 78           | 0       |
| BIOLUPUS: Belgium                                                 | 39                       | 53          | 0            | 0           | 0                       | 0           | 39           | 53      |
| Pons-Estel: Argentina (Europeans)                                 | 44                       | 0           | 0            | 0           | 0                       | 0           | 44           | 0       |
| BIOLUPUS: Spain                                                   | 464                      | 419         | 0            | 0           | 0                       | 0           | 464          | 419     |
| BIOLUPUS: Portugal                                                | 186                      | 174         | 0            | 0           | 0                       | 0           | 186          | 174     |
| BIOLUPUS: Hungary                                                 | 25                       | 47          | 0            | 0           | 0                       | 0           | 25           | 47      |
| BIOLUPUS: Italy                                                   | 339                      | 309         | 0            | 0           | 0                       | 0           | 339          | 309     |
| BIOLUPUS: Holland                                                 | 65                       | 0           | 0            | 0           | 0                       | 0           | 65           | 0       |
| BIOLUPUS: Danish                                                  | 17                       | 0           | 0            | 0           | 0                       | 0           | 17           | 0       |
| <b>Totals:</b>                                                    | <b>3980</b>              | <b>3546</b> | <b>1272</b>  | <b>1270</b> | <b>1406</b>             | <b>1734</b> |              |         |

<sup>a</sup>PROFILE (US multi-ethnic, multi-regional cohort of lupus patients), <sup>b</sup>LFRR (Lupus Family Registry and Repository), <sup>c</sup>LuMNAS (Univ. of Minnesota Lupus Association Cohort), <sup>d</sup>TRIDOM (University of Chicago Translational Research in the Department of Medicine registry), <sup>e</sup>Feinstein Institute of Medical Research (laboratory of Dr. Gregersen).

**Table S2:** Demographics of the ABCoN/NYCP re-sequencing samples

| <b>Ancestry</b>   | <b>Case</b> |               |              | <b>Control</b> |               |              |
|-------------------|-------------|---------------|--------------|----------------|---------------|--------------|
|                   | <i>Male</i> | <i>Female</i> | <b>Total</b> | <i>Male</i>    | <i>Female</i> | <b>Total</b> |
| European-Ancestry | 0           | 191           | <b>191</b>   | 0              | 96            | <b>96</b>    |



## Supplemental Acknowledgements

Research reported in this publication was supported by the National Institute of Arthritis and Musculoskeletal and Skin Diseases, National Institute of General Medicinal Sciences, and the National Institute of Allergy and Infectious Disease of the National Institutes of Health under award numbers P30 AR053483, U19 AI082714, P30 GM103510, U01 AI101934 , R01 AI063274, R01 AR056360, R01 AR043274, N01 AR62277 , R3724717, AR042460, P01 AI083194 , P20 RR020143 , R01 DE018209, P01 AR49084, P30 AR055385, K08 AI083790, LRP AI071651, R01 CA141700, RC1 AR058621, UL1 RR024999, R01 AR051545-01A2, R21 AI070304, R01 AI070983, RO1 AR43814, P60 AR053308, M01 RR-00079, R01 AI090343, P60 AR062755, UL1 RR029882, P01AR49084, K24AR002138, UL1RR025741. A portion of this study was supported by a grant of the Korea Healthcare Technology R&D Project, Ministry for Health and Welfare, Republic of Korea (HI12C1834) and support from the National High Technology Research & Development Program of China (Program 863) (No. 2007AA02Z123), the Key Basic Program of the Shanghai Commission of Science & Technology (No. 06JC14050), the Program of Shanghai Subject Chief Scientist (No. 07XD14021) and the Chinese National Natural Science Foundation Grant (No.30471613) (N.S.). Additional support was granted from the Alliance for Lupus Research, Merit Award from the US Department of Veterans Affairs, the Barrett Scholarship Fund OMRF, Lupus Research Institute, The Alliance for Lupus Research, the Arthritis National Research Foundation Eng Tan Scholar Award, Arthritis Foundation, and the Lupus Foundation of Minnesota. Additional funding was awarded from the Wellcome Trust, Arthritis Research UK , CTSA Grant Number I ULI RR025014-02 from the National Center for Research Resources (NCRR), a component of the NIH, Kirkland Scholar Award, Wake Forest University Health Sciences Center for Public Health Genomics,

NIH training grants T32HD07463, T32GM063483, and an Albert J. Ryan Foundation Fellowship , Instituto de Salud Carlos III (PI12/02558), the Swedish Research Council and the support from the European Science Foundation for the BIOLUPUS RNP and the Office for Human Research Studies award # HR08-037 from the Oklahoma Center for the Advancement of Science & Technology. The content of this publication is solely the responsibility of the authors and does not necessarily represent the official views of the National Institutes of Health or any other funding organization.

### **Supplemental References**

1. Yarden, G., Elfakess, R., Gazit, K., and Dikstein, R. (2009). Characterization of sINR, a strict version of the Initiator core promoter element. *Nucleic Acids Res* 37, 4234-4246.
